# Supplementary material for: Antibody Responses to Antigenic Targets of Recent Exposure Are Associated With Low-Density Parasitemia in Controlled Human Plasmodium falciparum Infections
Source: Front Microbiol. 2019 Jan 16;9:3300. doi: 10.3389/fmicb.2018.03300 (PMC6343524; doi:10.3389/fmicb.2018.03300)
Supplement: Supplementary file 2 [file Table_2.xlsx]

## Sheet: Sheet1
Supplementary Table 2: Characteristics of antigens included on the protein microarray
Order	Gene ID	Acronym	Description	Location	Expression tag	Strain	Reference
1	PF3D7_1001100_1_ACBP1	ACBP1	exported protein, unknown function: Phista	iRBC	GST	3D7	Helb et al (PMID: 26216993); Tetteh unpublished
2	PF3D7_0731600	ACS5 Ag 4	Acyl CoA Synthase. Antigen 4 (fragment 4)	iRBC	GST	3D7	Helb et al (PMID: 26216993); Tetteh unpublished
3	PF3D7_0304600	CSP	Most predominant and antigenic protein on sporozoite surface. Component of RTS,S vaccine	Sporozoite	n/a	3D7	Kastenmuller et al (PMID: 23275094)
4	PF3D7_1301600	EBA140 RIII-V	erythrocyte binding antigen 140; involved in invasion	Apical organelles, micronemes	GST	3D7	Richards et al (PMID: 20843207)
5	PF3D7_0731500	EBA175RII_F2	erythrocyte binding antigen 175; RBC binding region via glycophorin A	Apical tip	GST	3D7	Richards et al (PMID: 20843207)
6	PF3D7_1101800	EPF1v2	Exported protein; PV to iRBC surface	iRBC, maurer's cleft	GST	3D7	Helb et al (PMID: 26216993); Tetteh unpublished
7	PF3D7_0423700	Etramp 4 antigen 1	Early transcribed membrane antigen. Integral PVM protein. N-terminal	iRBC, PVM	GST	3D7	Helb et al (PMID: 26216993); Tetteh unpublished
8	PF3D7_0423700	Etramp 4 antigen 2	Early transcribed membrane antigen. Integral PVM protein. C-terminal	iRBC, PVM	GST	3D7	Helb et al (PMID: 26216993); Tetteh unpublished
9	PF3D7_0532100	Etramp 5 Ag 1	Early transcribed membrane antigen. Integral PVM protein.	iRBC, PVM	GST	3D7	Spielmann et al (PMID: 12686607); Tetteh K unpublished
10	PF3D7_0532100	Etramp 5 Ag 2	Early transcribed membrane antigen. Integral PVM protein.	iRBC, PVM	GST	3D7	Helb et al (PMID: 26216993); Tetteh unpublished
11	PF3D7_0402400	GEXP18	Gametocyte exported protein 18. Unknown function.	iRBC/Gametocyte	GST	3D7	Helb et al (PMID: 26216993); Tetteh unpublished
12	PF3D7_1035300	GLURP R0	Glutamate rich protein R0	Merozoite Surface	n/a	F32	Theisen et al (PMID: 7719909)
13	PF3D7_1035300	GLURP R2	Glutamate rich protein R2	Merozoite Surface	n/a	F32	Theisen et al (PMID: 7719909)
14	PF3D7_0501100.1	HSP40 Ag 1	Heat shock protein 40	iRBC	GST	3D7	Helb et al (PMID: 26216993); Tetteh unpublished
15	PF3D7_0501100.1	HSP40 Ag 3	Heat shock protein 40	iRBC	GST	3D7	Helb et al (PMID: 26216993); Tetteh unpublished
16	PF3D7_0207000	MSP4	Merozoite surface protein.	Merozoite surface	GST	D10	Marshall et al (PMID: 9353020)
17	PF3D7_0206900	MSP5	Merozoite surface protein.	Merozoite surface	GST	3D7	Marshall et al (PMID: 9719507)
18	PF3D7_1035700	MSP DBL1 N-term	MSPDBL1 N-terminal	Merozoite surface	GST	3D7	Tetteh et al (PMID: 23897617)
19	PF3D7_0930300	MSP1 bk2 MAD20 Rep	MSP1 block 2 MAD20 allele (MAD20 type) repeat region only.	Merozoite surface	GST	MAD20	Polley et al (PMID: 12654798)
20	PF3D7_0930300	MSP1 bk2 MAD20 full	MSP1 block 2 MAD20 allele (MAD20 type) full-length region (repeat and type-specific flanking region).	Merozoite surface	GST	MAD20	Kimbi et al (PMID: 15109551)
21	PF3D7_0930300	MSP1 bk2 Well Rep	MSP1 block 2 Wellcome allele (MAD20 type) full block 2 region, repeat only, type specific flanking region removed	Merozoite surface	GST	Wellcome	Polley et al (PMID: 12654798)
22	PF3D7_0930300	MSP1 block 2 Palo Alto Repeat	MSP1 block 2 Palo Alto allele K1 type) full block 2 region, repeat only, type specific flanking region removed	Merozoite surface	GST	Palo Alto	Polley et al (PMID: 12654798)
23	PF3D7_0930300	MSP1 block 2 Palo Alto full #6	MSP1 block 2 Palo Alto allele K1 type) full block 2 region, includes type specific flanking region	Merozoite surface	GST	Palo Alto	Polley et al (PMID: 12654798)
24	PF3D7_0930300	MSP1 block 2 R033	MSP1 block 2 R033 allele (R033 type) full-length.	Merozoite surface	GST	RO33	Kimbi et al (PMID: 15109551)
25	PF3D7_0930300	MSP1 block 2 Well full	MSP1 block 2 Wellcome allele (MAD20 type) full block 2 region, includes type specific flanking region	Merozoite surface	GST	Wellcome	Kimbi et al (PMID: 15109551)
26	PF3D7_0206800	MSP2 CH150/9	CH150/9 allele of MSP2. Full-length.	Merozoite surface	GST	CH150/9	Polley et al (PMID: 16111789)
27	PF3D7_0206800	MSP2 Dd2	Dd2 allele of MSP2. Full-length.	Merozoite surface	GST	DD2	Taylor et al (PMID: 7591074)
28	PF3D7_1035400	MSP3-3D7	MSP3 3D7 allele	Merozoite surface	MBP	3D7	Polley et al (PMID: 17191173)
29	PF3D7_1035700	PF10_0348 C-term	MSPDBL1 C-terminal	Merozoite surface	GST	3D7	Tetteh et al (PMID: 23897617)
30	PF3D7_1036300	PF10_0355 C-term	Duplicate antigen. MSPDBL2 C-terminal	Merozoite surface	GST	3D7	Tetteh et al (PMID: 23897617)
31	Pf3D7_0402000	Phista_0402000	exported protein, unknown function: Phista	iRBC cytoplasm	GST	3D7	Helb et al (PMID: 26216993); Tetteh unpublished
32	Pf3D7_0424900	Phista_0424900	exported protein, unknown function: Phista	iRBC cytoplasm	GST	3D7	Helb et al (PMID: 26216993); Tetteh unpublished
33	Pf3D7_0425400	Phista_0425400	exported protein, unknown function: Phista	iRBC cytoplasm	GST	3D7	Helb et al (PMID: 26216993); Tetteh unpublished
34	Pf3D7_0601700	Phista_0601700	exported protein, unknown function: Phista	iRBC cytoplasm	GST	3D7	Helb et al (PMID: 26216993); Tetteh unpublished
35	PF3D7_1133400	AMA1	Apical membrane antigen 1	micronemes	His	FVO	Collins et al (PMID: 17192270)
36	PF3D7_0930300	MSP1-19	19kDa fragment of MSP1 molecule.	Merozoite surface	GST	Wellcome	Burghaus and Holder (PMID: 8078519)
37	PF3D7_1021800	PfSEA-1	Schizont egress antigen.	iRBC	GST	3D7	Raj et al (PMID: 24855263); Tetteh K unpublished
38	PF3D7_0936300	REX 3	Ring exported protein,	iRBC	GST	3D7	Helb et al (PMID: 26216993); Tetteh unpublished
39	PF3D7_0424100	Rh5	Receptor for human protein Basigin.	Apical tip	C-tag	3D7	Jin et al (PMID: 30131879); Crosnier et al (PMID: 22080952); Tetteh K unpublished
40	PF3D7_0501300	SBP1	skeleton-binding protein; essential for translocation of PfEMP1 to iRBS surface via Maurer's cleft.	iRBC	GST	3D7	Gruring et al (PMID: 21266965); Tetteh K unpublished
GPI anchored = Glycosylphosphatidylinisotol anchored
PVM = parasitophorous vacuolar membrane
iRBC = infected red blood cell
